# Supplementary material
Source: Springer Nature journal article supplement (https://www.springermedizin.de/resource/supplementary/13633_2011_11_MOESM2_ESM.pdf/9595454)

A

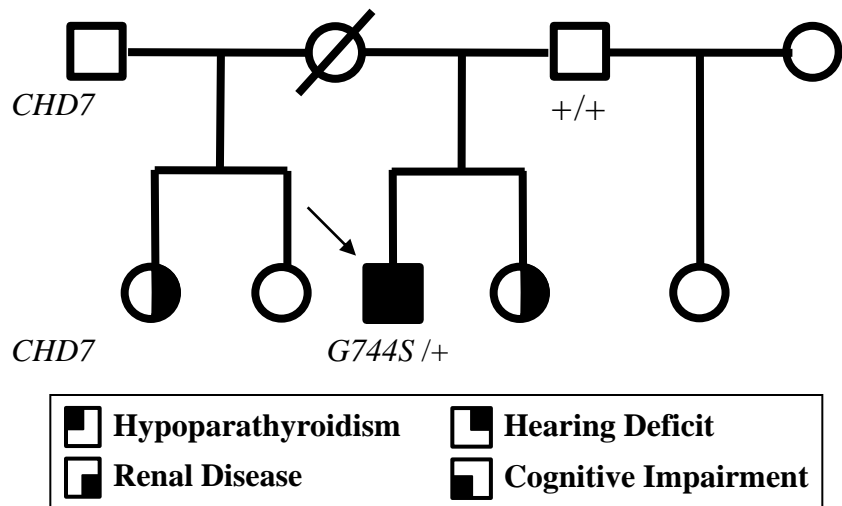

B

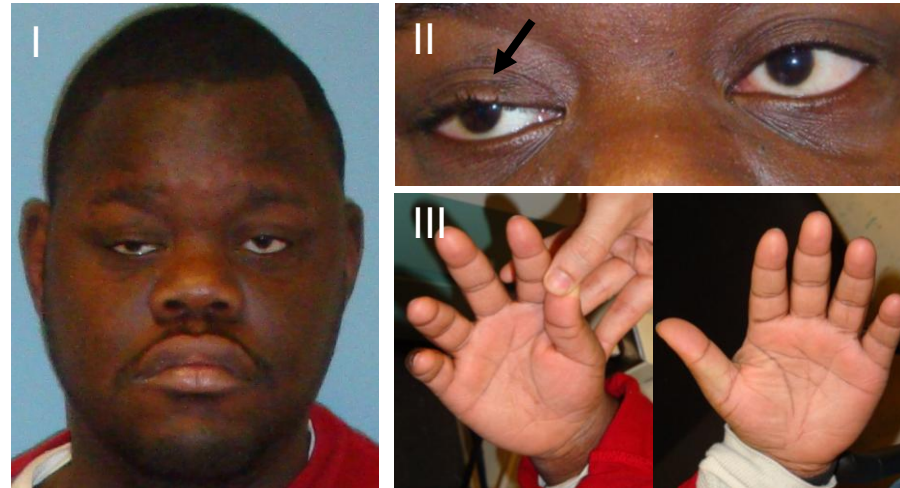

C

**G744**

↓

|              |                                         |     |
|--------------|-----------------------------------------|-----|
| Human        | SPPPEEDED <b>P</b> GVQKRRSSRQV          | 754 |
| Orangutan    | SPPPEEDED <b>P</b> GVQKRRSSRQV          | 754 |
| Chimpanzee   | SPPPEEDED <b>P</b> GVQKRRSSRQV          | 798 |
| Monkey       | SPPPEEDED <b>P</b> GVQKRRSSRQV          | 783 |
| Panda        | SPP-EEDED <b>P</b> GVQKRRSSRQV          | 752 |
| Horse        | S <b>P</b> LPEEDED <b>P</b> GVQKRRSSRQV | 753 |
| Dog          | SPPPEEDED <b>P</b> GVQKRRSSRQV          | 753 |
| Cow          | SPPPE <b>D</b> DED <b>P</b> GVQKRRSSRQV | 702 |
| Pig          | SPPPE <b>D</b> DED <b>P</b> GVQKRRSSRQV | 747 |
| Mouse        | S <b>P</b> APEEDED <b>P</b> GVQKRRSSRQV | 744 |
| Rabbit       | SPPPEEDED <b>P</b> GVQKRRSSRQV          | 754 |
| Chicken      | S <b>P</b> HPEEDED <b>P</b> GVQKRRSSRQV | 755 |
| African Frog | PPPPEEED <b>S</b> GVQKRRSSRQV           | 730 |
| Western Frog | PPP-EEED <b>S</b> GVQKRRSSRQV           | 680 |
| Zebrafish    | --SPEEED <b>D</b> GVQKRRSSRQV           | 802 |

D

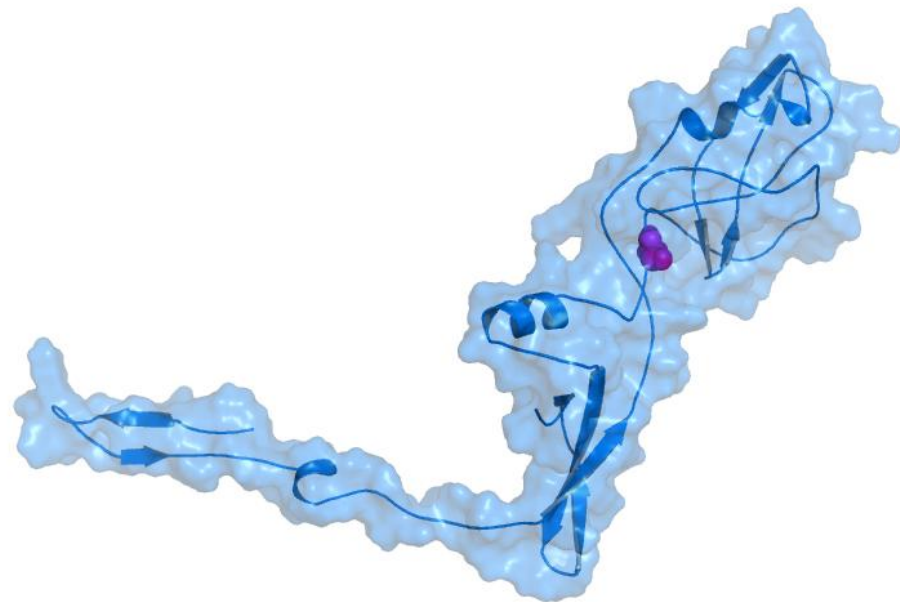

Supplement: MOESM2 [file 9595454]
